# Supplementary material for: The Effects of Vegetation and the Environment on Testate Amoeba Assemblages in Sphagnum Peatlands in the Northern Caucasus Mountains
Source: MDPI journal article supplement (doi:10.3390/d15020258), 2023-02-12
Supplement: s1 [file s1]

## Supplementary Materials

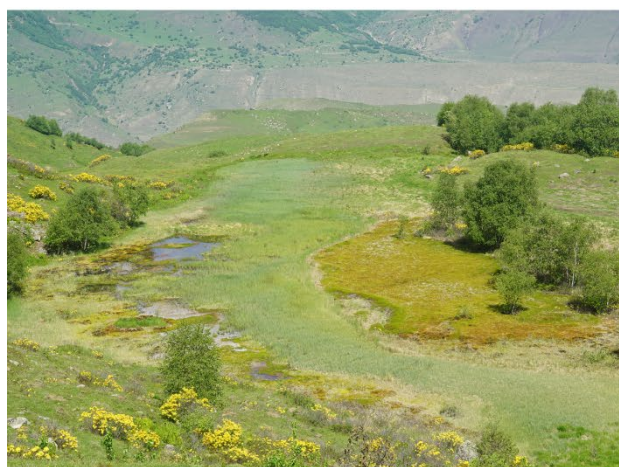

**(a)**

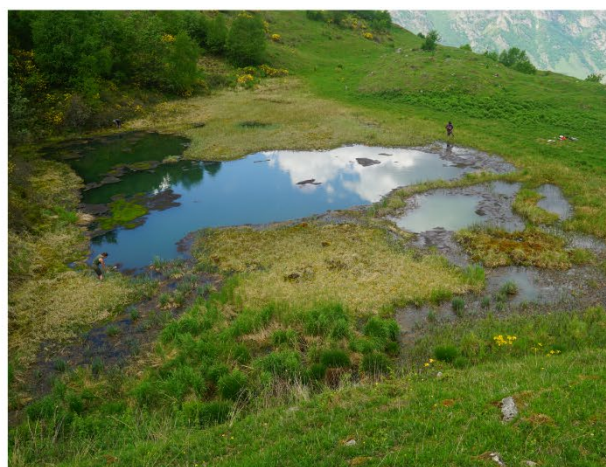

**(b)**

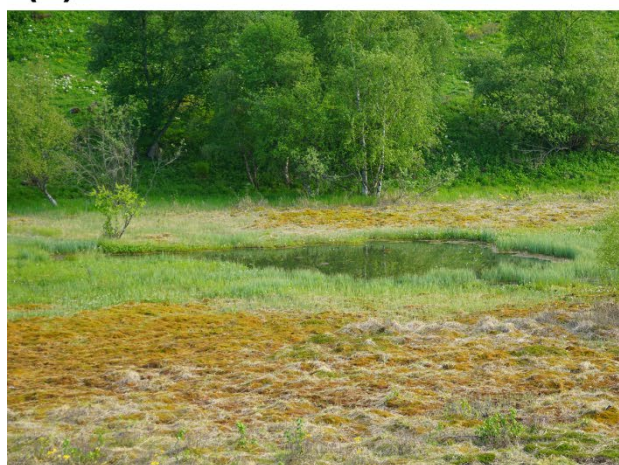

**(c)**

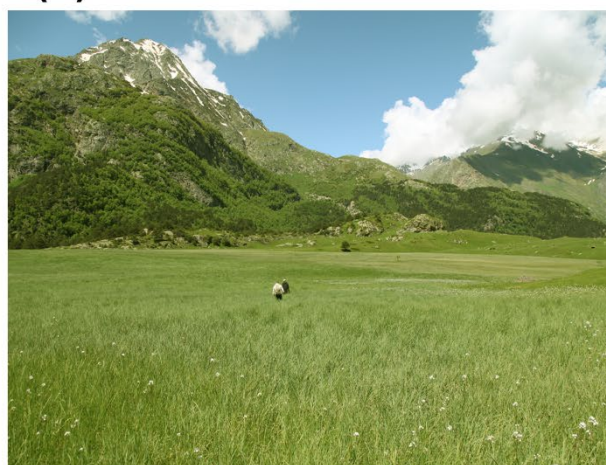

**(d)**

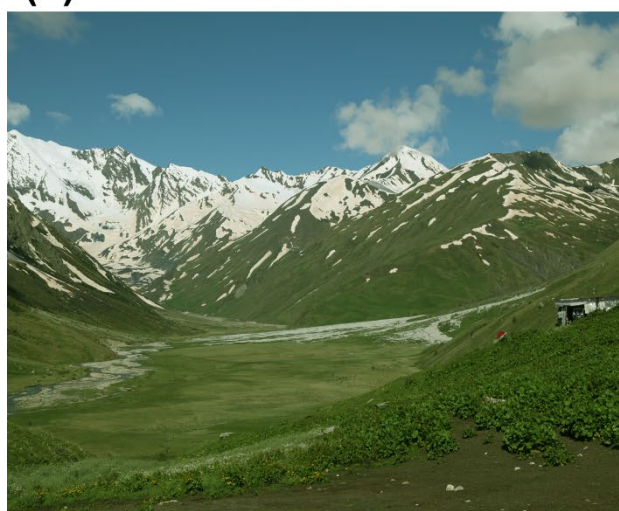

**(e)**

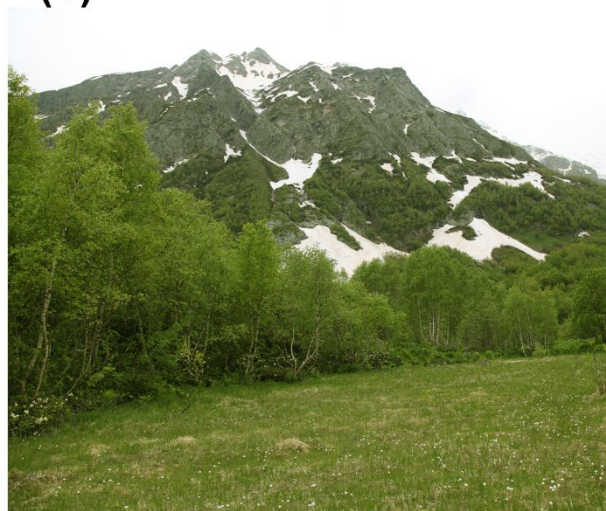

**(f)**

**Figure S1.** Images of the studied mires. Kabardno-Balkaria: Zayachye **(a)**, Vysokoe **(b)**, Konkoe **(c)**, Ushtulu **(d)**; North Ossetia-Alania: Chifanzar **(e)** and Lower Kubus **(f)**.

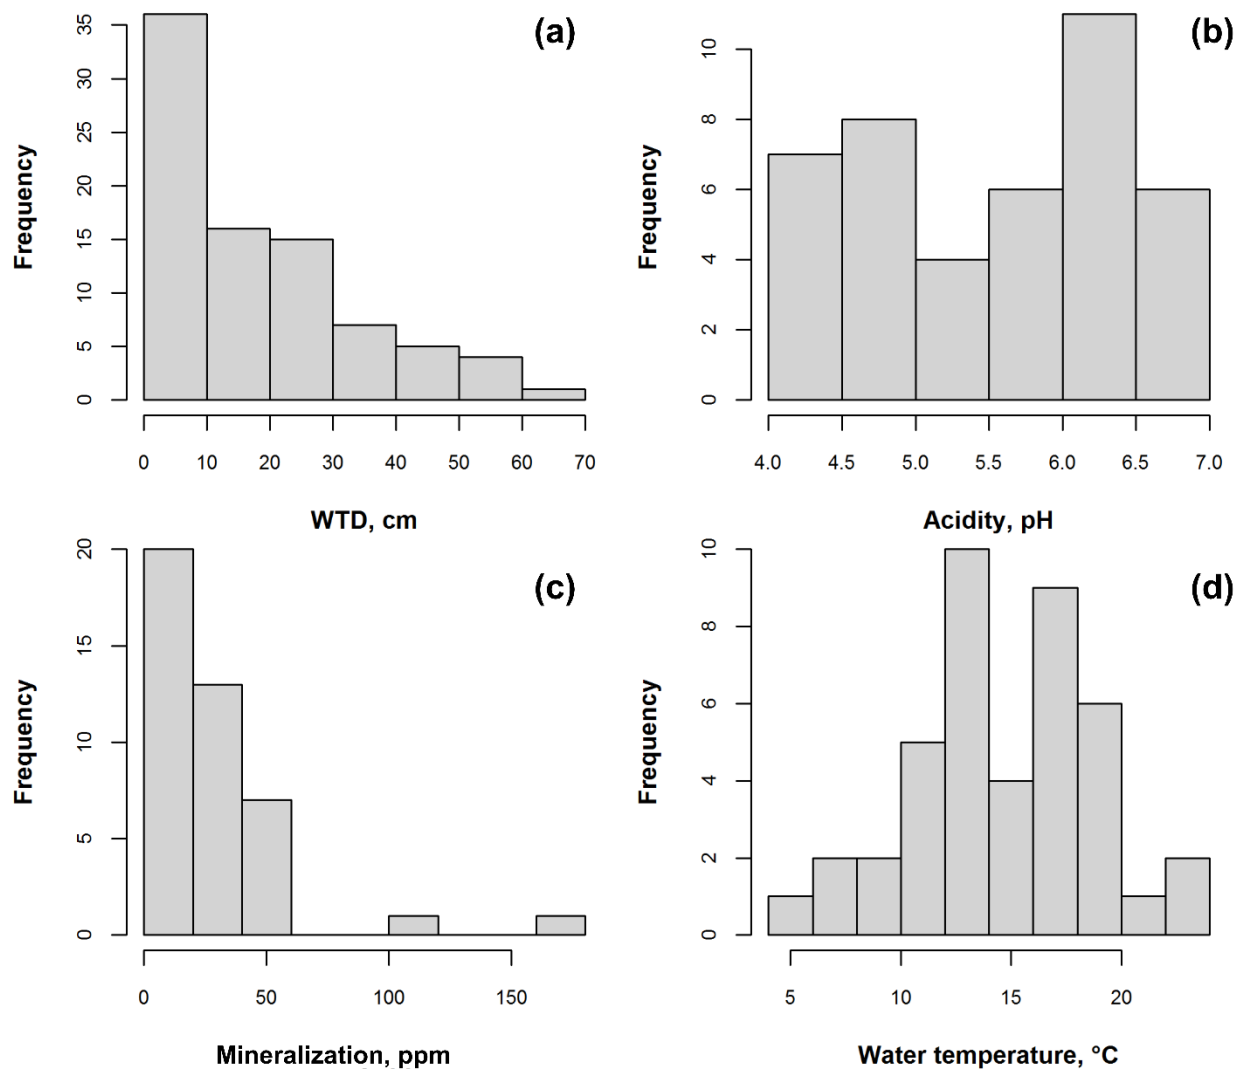

**Figure S2.** Histograms of (a) water table depths (WTD, cm), (b) acidity (pH), (c) mineralization (ppm) and (d) water temperature (C °) in *Sphagnum*-dominated biotopes of eight mires in the Northern Caucasus Mountains.

**Table S1.** An alphabetical list of the encountered testate amoebae taxa, their relative abundance (% to the total counts), occurrence (% to the total number of samples) and maximal relative abundance per sample (%).

|    | Taxa                                             | Taxa codes       | Relative abundance, % | Occurrence, % | Maximal relative abundance per sample, % |
|----|--------------------------------------------------|------------------|-----------------------|---------------|------------------------------------------|
| 1  | <i>Alabasta longicollis</i>                      | <i>Ala.lon</i>   | 0.1                   | 1.2           | 4.7                                      |
| 2  | <i>Alabasta militaris</i>                        | <i>Ala.mil</i>   | 0.4                   | 10.7          | 16.0                                     |
| 3  | <i>Arcella arenaria</i>                          | <i>Arc.are</i>   | 0.1                   | 3.6           | 1.3                                      |
| 4  | <i>Arcella arenaria compressa</i>                | <i>Arc.arec</i>  | 0.0                   | 2.4           | 1.3                                      |
| 5  | <i>Arcella artocrea</i>                          | <i>Arc.art</i>   | 0.1                   | 4.8           | 6.0                                      |
| 6  | <i>Arcella catinus</i>                           | <i>Arc.cat</i>   | 0.0                   | 2.4           | 1.3                                      |
| 7  | <i>Arcella dentata</i>                           | <i>Arc.den</i>   | 0.0                   | 1.2           | 0.7                                      |
| 8  | <i>Arcella discoides</i>                         | <i>Arc.dis</i>   | 0.1                   | 6.0           | 2.7                                      |
| 9  | <i>Arcella discoides foveosa</i>                 | <i>Arc.disf</i>  | 0.2                   | 8.3           | 6.7                                      |
| 10 | <i>Arcella discoides pseudovulgaris</i>          | <i>Arc.disp</i>  | 0.0                   | 1.2           | 10.0                                     |
| 11 | <i>Arcella discoides pseudovulgaris undulata</i> | <i>Arc.dispu</i> | 0.0                   | 1.2           | 2.0                                      |
| 12 | <i>Arcella discoides scutelliformis</i>          | <i>Arc.diss</i>  | 0.0                   | 1.2           | 0.7                                      |
| 13 | <i>Arcella hemisphaerica</i>                     | <i>Arc.hem</i>   | 0.0                   | 2.4           | 8.0                                      |
| 14 | <i>Arcella intermedia</i>                        | <i>Arc.hema</i>  | 0.0                   | 1.2           | 0.7                                      |
| 15 | <i>Arcella intermedia laevis</i>                 | <i>Arc.intl</i>  | 0.1                   | 1.2           | 4.0                                      |
| 16 | <i>Arcella rotundata</i>                         | <i>Arc.rot</i>   | 0.2                   | 6.0           | 12.0                                     |
| 17 | <i>Arcella rotundata stenostoma undulata</i>     | <i>Arc.rosu</i>  | 0.0                   | 3.6           | 1.3                                      |
| 18 | <i>Arcella vulgaris</i>                          | <i>Arc.vul</i>   | 0.1                   | 2.4           | 10.7                                     |
| 19 | <i>Arcella vulgaris polymorpha</i>               | <i>Arc.vulp</i>  | 0.0                   | 1.2           | 4.0                                      |
| 20 | <i>Argygnia dentistoma</i>                       | <i>Arg.den</i>   | 0.9                   | 28.6          | 12.0                                     |
| 21 | <i>Argygnia vitraea</i>                          | <i>Arg.vit</i>   | 0.1                   | 2.4           | 2.7                                      |
| 22 | <i>Assulina muscorum</i>                         | <i>Ass.mus</i>   | 15.3                  | 83.3          | 90.0                                     |
| 23 | <i>Assulina seminulum</i>                        | <i>Ass.sem</i>   | 0.0                   | 1.2           | 0.7                                      |
| 24 | <i>Awerintzewia cyclostoma</i>                   | <i>Awe.cyc</i>   | 0.0                   | 1.2           | 2.0                                      |
| 25 | <i>Centropyxis aculeata</i>                      | <i>Cen.acu</i>   | 0.2                   | 10.7          | 8.0                                      |
| 26 | <i>Centropyxis aculeata lata</i>                 | <i>Cen.acul</i>  | 0.0                   | 1.2           | 2.0                                      |
| 27 | <i>Centropyxis aculeata oblonga</i>              | <i>Cen.acuo</i>  | 0.0                   | 2.4           | 1.3                                      |
| 28 | <i>Centropyxis aerophila</i>                     | <i>Cen.aer</i>   | 0.5                   | 21.4          | 10.0                                     |
| 29 | <i>Centropyxis aerophila sphagnicola</i>         | <i>Cen.aers</i>  | 0.1                   | 4.8           | 1.3                                      |

|    | Taxa                                    | Taxa codes      | Relative abundance, % | Occurrence, % | Maximal relative abundance per sample, % |
|----|-----------------------------------------|-----------------|-----------------------|---------------|------------------------------------------|
| 30 | <i>Centropyxis cassis</i>               | <i>Cen.cass</i> | 0.1                   | 8.3           | 2.0                                      |
| 31 | <i>Centropyxis elongata</i>             | <i>Cen.elo</i>  | 0.1                   | 6.0           | 5.3                                      |
| 32 | <i>Centropyxis platystoma</i>           | <i>Cen.pla</i>  | 0.1                   | 6.0           | 2.0                                      |
| 33 | <i>Corythion dubium</i>                 | <i>Cor.dub</i>  | 5.1                   | 51.2          | 49.3                                     |
| 34 | <i>Cryptodifflugia oviformis</i>        | <i>Cry.ovi</i>  | 14.3                  | 63.1          | 80.7                                     |
| 35 | <i>Cryptodifflugia oviformis fuscum</i> | <i>Cry.ovif</i> | 0.6                   | 28.6          | 9.3                                      |
| 36 | <i>Cyclopyxis eurystoma</i>             | <i>Cyc.eyr</i>  | 0.2                   | 6.0           | 6.7                                      |
| 37 | <i>Cyclopyxis kahli</i>                 | <i>Cyc.kah</i>  | 0.0                   | 2.4           | 2.0                                      |
| 38 | <i>Cyclopyxis kahli cyclostoma</i>      | <i>Cyc.kahc</i> | 0.0                   | 1.2           | 0.7                                      |
| 39 | <i>Cyphoderia ampulla</i>               | <i>Cyp.amp</i>  | 0.2                   | 9.5           | 4.7                                      |
| 40 | <i>Difflugia bacillifera</i>            | <i>Dif.bac</i>  | 0.0                   | 1.2           | 2.0                                      |
| 41 | <i>Difflugia globulosa</i>              | <i>Dif.glo</i>  | 0.1                   | 4.8           | 1.3                                      |
| 42 | <i>Difflugia lucida</i>                 | <i>Dif.luc</i>  | 0.0                   | 2.4           | 0.7                                      |
| 43 | <i>Difflugia oblonga</i>                | <i>Dif.obl</i>  | 0.0                   | 1.2           | 0.7                                      |
| 44 | <i>Difflugia penardi</i>                | <i>Dif.pen</i>  | 0.4                   | 16.7          | 10.0                                     |
| 45 | <i>Difflugia rubescens</i>              | <i>Dif.rub</i>  | 0.0                   | 1.2           | 0.7                                      |
| 46 | <i>Euglypha acantophora</i>             | <i>Eug.aca</i>  | 0.0                   | 1.2           | 0.7                                      |
| 47 | <i>Euglypha bryophila</i>               | <i>Eug.bry</i>  | 0.0                   | 1.2           | 0.6                                      |
| 48 | <i>Euglypha ciliata</i>                 | <i>Eug.cil</i>  | 0.3                   | 11.9          | 7.3                                      |
| 49 | <i>Euglypha compressa</i>               | <i>Eug.com</i>  | 0.3                   | 6.0           | 9.3                                      |
| 50 | <i>Euglypha compressa glabra</i>        | <i>Eug.comg</i> | 0.0                   | 2.4           | 0.7                                      |
| 51 | <i>Euglypha cristata</i>                | <i>Eug.cri</i>  | 1.0                   | 22.6          | 21.3                                     |
| 52 | <i>Euglypha denticulata</i>             | <i>Eug.den</i>  | 0.3                   | 4.8           | 18.7                                     |
| 53 | <i>Euglypha filifera</i>                | <i>Eug.fil</i>  | 0.2                   | 13.1          | 4.0                                      |
| 54 | <i>Euglypha filifera pyriformis</i>     | <i>Eug.filp</i> | 0.0                   | 1.2           | 0.7                                      |
| 55 | <i>Euglypha laevis</i>                  | <i>Eug.lae</i>  | 2.1                   | 32.1          | 22.0                                     |
| 56 | <i>Euglypha rotunda</i>                 | <i>Eug.rot</i>  | 3.3                   | 44.0          | 54.0                                     |
| 57 | <i>Euglypha strigosa</i>                | <i>Eug.str</i>  | 0.6                   | 11.9          | 16.0                                     |
| 58 | <i>Euglypha tuberculata</i>             | <i>Eug.tub</i>  | 0.4                   | 16.7          | 10.7                                     |
| 59 | <i>Gibbocarina galeata</i>              | <i>Gib.gal</i>  | 0.1                   | 7.1           | 2.0                                      |
| 60 | <i>Gibbocarina gracilis</i>             | <i>Gib.gra</i>  | 0.0                   | 1.2           | 0.7                                      |
| 61 | <i>Heleopera petricola</i>              | <i>Hel.pet</i>  | 0.2                   | 9.5           | 6.0                                      |
| 62 | <i>Heleopera rosea</i>                  | <i>Hel.ros</i>  | 0.2                   | 11.9          | 9.3                                      |
| 63 | <i>Heleopera sphagni</i>                | <i>Hel.sph</i>  | 0.0                   | 3.6           | 1.3                                      |
| 64 | <i>Hyalosphenia papilio</i>             | <i>Hya.pap</i>  | 11.0                  | 40.5          | 82.7                                     |
| 65 | <i>Hyalosphenia platystoma</i>          | <i>Hya.pla</i>  | 0.1                   | 9.5           | 1.3                                      |

|    | Taxa                                | Taxa codes      | Relative abundance, % | Occurrence, % | Maximal relative abundance per sample, % |
|----|-------------------------------------|-----------------|-----------------------|---------------|------------------------------------------|
| 66 | <i>Lagenodifflugia sphaeroideus</i> | <i>Lag.sph</i>  | 0.0                   | 1.2           | 2.0                                      |
| 67 | <i>Lesquereusia gibbosa</i>         | <i>Les.gib</i>  | 0.0                   | 2.4           | 0.7                                      |
| 68 | <i>Lesquereusia spiralis</i>        | <i>Les.spi</i>  | 0.0                   | 2.4           | 2.0                                      |
| 69 | <i>Longinebela penardiana</i>       | <i>Lon.pen</i>  | 0.5                   | 20.2          | 6.0                                      |
| 70 | <i>Longinebela tubulosa</i>         | <i>Lon.tub</i>  | 0.0                   | 3.6           | 1.3                                      |
| 71 | <i>Microchlamys patella</i>         | <i>Mic.pat</i>  | 0.8                   | 15.5          | 23.3                                     |
| 72 | <i>Nebela collaris</i>              | <i>Neb.col</i>  | 0.5                   | 22.6          | 4.7                                      |
| 73 | <i>Nebela tinctoria</i>             | <i>Neb.tin</i>  | 0.5                   | 16.7          | 21.3                                     |
| 74 | <i>Netzelia wailesi</i>             | <i>Net.wai</i>  | 0.0                   | 3.6           | 1.3                                      |
| 75 | <i>Padaungiella lageniformis</i>    | <i>Pad.lag</i>  | 0.3                   | 10.7          | 10.0                                     |
| 76 | <i>Padaungiella wailesi</i>         | <i>Pad.wai</i>  | 0.0                   | 1.2           | 0.7                                      |
| 77 | <i>Phryganella acropodia</i>        | <i>Phr.acr</i>  | 0.4                   | 17.9          | 12.0                                     |
| 78 | <i>Playfairina valkanovi</i>        | <i>Play.val</i> | 0.1                   | 8.3           | 2.7                                      |
| 79 | <i>Pontigulasia incisa</i>          | <i>Pon.inc</i>  | 0.0                   | 4.8           | 0.7                                      |
| 80 | <i>Pyxidicula cymbalum</i>          | <i>Pyx.cym</i>  | 0.0                   | 2.4           | 0.7                                      |
| 81 | <i>Pyxidicula operculata</i>        | <i>Pyx.ope</i>  | 0.0                   | 3.6           | 2.0                                      |
| 82 | <i>Quadrullella symmetrica</i>      | <i>Qua.sym</i>  | 0.6                   | 26.2          | 8.7                                      |
| 83 | <i>Sphenoderia fissirostris</i>     | <i>Sph.fis</i>  | 0.0                   | 1.2           | 0.7                                      |
| 84 | <i>Sphenoderia lenta</i>            | <i>Sph.len</i>  | 0.0                   | 4.8           | 1.3                                      |
| 85 | <i>Tracheleuglypha dentata</i>      | <i>Tra.den</i>  | 0.6                   | 22.6          | 10.0                                     |
| 86 | <i>Trigonopyxis minuta</i>          | <i>Trg.min</i>  | 0.0                   | 2.4           | 2.0                                      |
| 87 | <i>Trinema complanatum</i>          | <i>Trn.com</i>  | 0.7                   | 23.8          | 10.0                                     |
| 88 | <i>Trinema enchelys</i>             | <i>Trn.enc</i>  | 10.2                  | 54.8          | 62.0                                     |
| 89 | <i>Trinema galeata</i>              | <i>Trn.gal</i>  | 0.2                   | 7.1           | 4.0                                      |
| 90 | <i>Trinema leidyi</i>               | <i>Trn.lei</i>  | 0.0                   | 2.4           | 0.7                                      |
| 91 | <i>Trinema lineare</i>              | <i>Trn.lin</i>  | 22.7                  | 92.9          | 80.7                                     |
| 92 | <i>Trinema lineare truncatum</i>    | <i>Trn.lint</i> | 0.2                   | 11.9          | 2.7                                      |
| 93 | <i>Trinema sp.</i>                  | <i>Trn.sp</i>   | 0.0                   | 1.2           | 0.7                                      |
| 94 | <i>Valkanovia delicatula</i>        | <i>Val.del</i>  | 1.2                   | 15.5          | 30.7                                     |
| 95 | <i>Wailesella eboracensis</i>       | <i>Wai.ebo</i>  | 0.0                   | 3.6           | 1.3                                      |
| 96 | <i>Zivkovicia compressa</i>         | <i>Ziv.com</i>  | 0.0                   | 3.6           | 2.0                                      |
| 97 | <i>Zivkovicia spectabilis</i>       | <i>Ziv.spe</i>  | 0.0                   | 2.4           | 1.3                                      |
